# Supplementary material for: Enterocin Cross-Resistance Mediated by ABC Transport Systems
Source: MDPI journal article supplement (doi:10.3390/microorganisms9071411), 2021-06-30
Supplement: s1 [file s1]

**Table S1.** Comparison between putative proteins of *mr10* and *l50* gene clusters. Table shows similarity between the proteins of the *mr10* cluster (MW689545) and the *l50* cluster deposited in Refseq (accession no. NC\_010880.1) and in Genbank (accession no. DQ198088.1).

| <i>l50</i> cluster Refseq | Per.Ident (%) | <i>mr10</i> cluster | Per.Ident (%) | <i>l50</i> cluster Genbank |
|---------------------------|---------------|---------------------|---------------|----------------------------|
| L50E                      | 87.64%        | Mr10E1              | 87.64%        | L50E                       |
| Orf7                      | 74.44%        | Mr10F1              | 74.44%        | L50F                       |
| Orf8                      | 79.02%        | Mr10G1              | 79.02%        | L50G                       |
| Orf9                      | 77.60%        | Mr10H1              | 77.60%        | Orf9                       |
| -                         | -             | Mr10H1              | 74.09%        | Orf10                      |
| As-48E                    | 73,62%        | Mr10E               | 73,62%        | As-48E                     |
| As-48F                    | 75.68%        | Mr10F               | 75.68%        | As-48F                     |
| As-48G                    | 92.51%        | Mr10G               | 92.51%        | As-48G                     |
| As-48H                    | 89.22%        | Mr10H               | 89.22%        | As-48H                     |

**Table S2.** Inhibition halo (expressed in mm) of each *E. faecalis* strain against different concentrations of MR10A/B bacteriocin.

|                                           | 1 (4 µg) | 2 (2 µg) | 3 (1 µg) | 4 (0.5 µg) | 5 (0.25 µg) |
|-------------------------------------------|----------|----------|----------|------------|-------------|
| (a) JH2-2 (pAM401)                        | 14       | 12       | 11       | 10         | 8           |
| (b) pAM401-64                             | 15       | 13       | 13       | 9          | 8           |
| (c) JH2-2(pAM401-52)                      | 14       | 13       | 11       | 9          | 8           |
| (d) JH2-2(pAM401-52::Tn5 <sub>F</sub> )   | 14       | 13       | 9        | 9          | 7           |
| (e) JH2-2(pAM401-52::Tn5 <sub>B-C</sub> ) | 14       | 13       | 12       | 9          | 8           |
| (f) JH2-2(pAM401-52::Tn5 <sub>D</sub> )   | 12       | 12       | 11       | 8          | 7           |
| (g) <i>E. faecalis</i> MRR10-3            | 8        | 8        | 7        | 5          | 3           |
| (h) <i>E. faecalis</i> A-48-32            | 10       | 10       | 7        | 4          | 2           |
| (i) JH2-2 (pAM401-81)                     | 8        | 7        | 6        | 3          | 0           |
| (j) D1Pst1                                | 11       | 10       | 6        | 5          | 3           |
| (k) JH2-2 (pAM401-81:: <i>as-48AB</i> )   | 11       | 9        | 6        | 4          | 0           |
| (l) JH2-2(pAM401-81::Tn5 <sub>B</sub> )   | 10       | 8        | 7        | 3          | 0           |

(I)

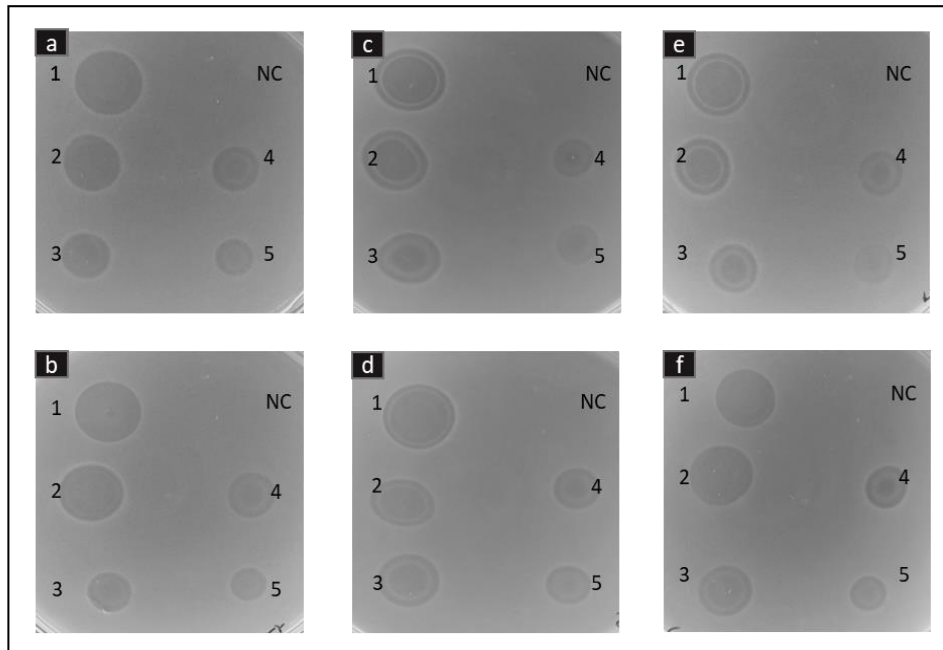

(II)

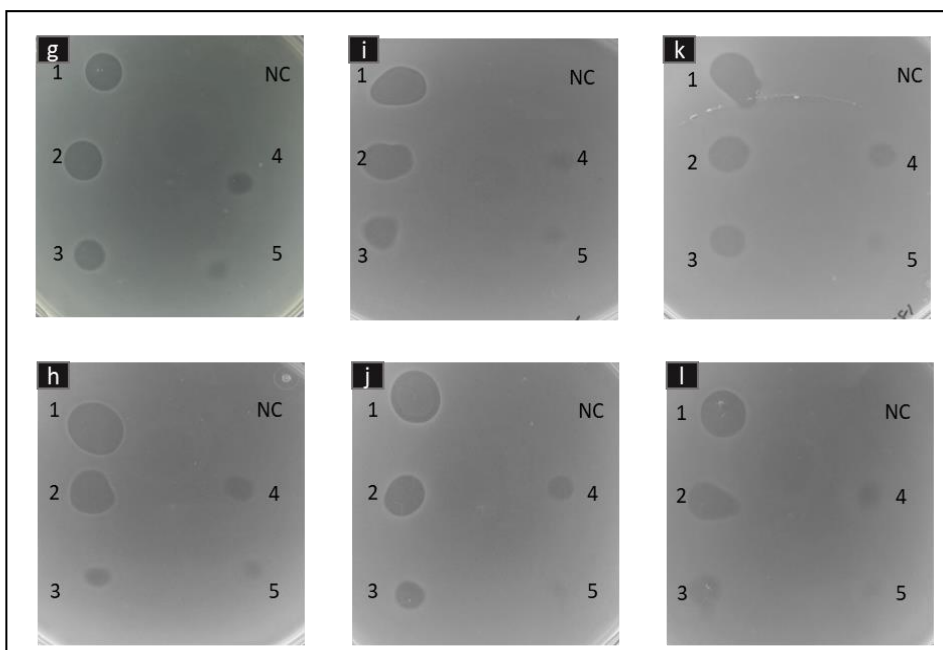

**Figure S1. Antibacterial activity assays.** (I) *E. faecalis* AS-48 strains without a functional AS-48 Transporter-2 against different concentrations of MR10A/B bacteriocin. (II) *E. faecalis* AS-48 strains with a functional AS-48 Transporter-2 against different concentrations of MR10A/B bacteriocin. Letters (a) to (l) represent each mutant: (a) JH2-2(pAM401), (b) JH2-2(pAM401-52::Tn5<sub>F</sub>), (c) pAM401-64, (d) JH2-2(pAM401-52::Tn5<sub>B-C</sub>), (e) JH2-2(pAM401-52), (f) JH2-2(pAM401-52::Tn5<sub>D</sub>), (g) *E. faecalis* MRR10-3, (h) D1Pst1, (i) *E. faecalis* A-48-32, (j) JH2-2(pAM401-81::as-48AB), (k) JH2-2(pAM401-81) and (l) JH2-2(pAM401-81::Tn5<sub>B</sub>). Numbers 1 to 5 represent amount of bacteriocin available in each spot, where: (1) 4 µg, (2) 2 µg, (3) 1 µg, (4) 0.5 µg and (5) 0.25 µg. (NC) Negative control (Bacteriocin dilution solution (acetic acid 0.05 %)). The size of each inhibition halo are shown in **Table S2**.
